# Supplementary material
Source: publisher figshare collection journal article supplement (https://acs.figshare.com/ndownloader/files/4398691)
Supplement: Supplementary file 1 [file 4398691]

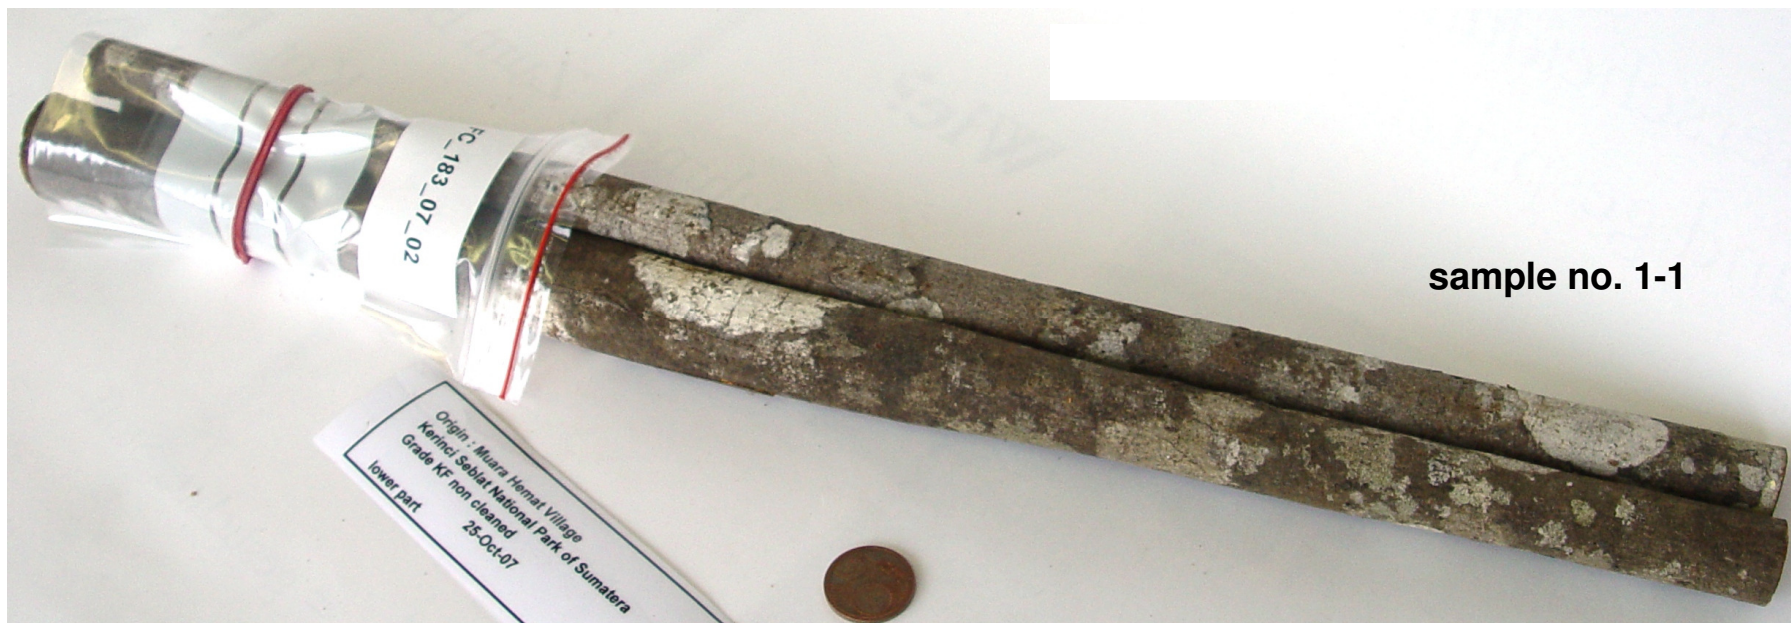

sample no. 1-1

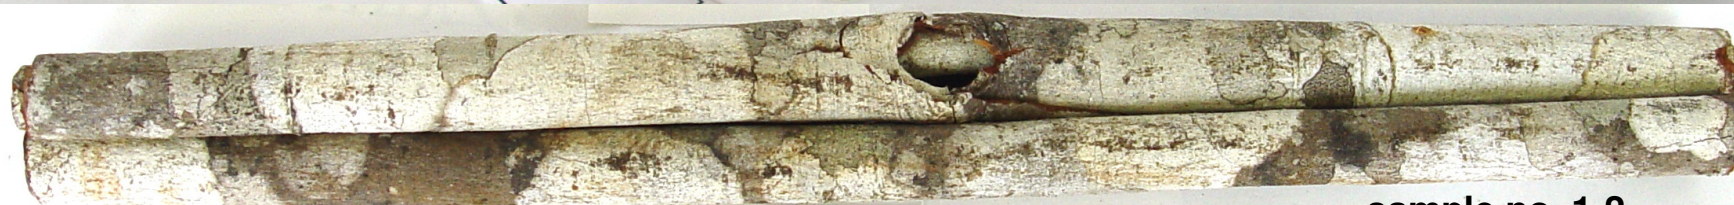

sample no. 1-2

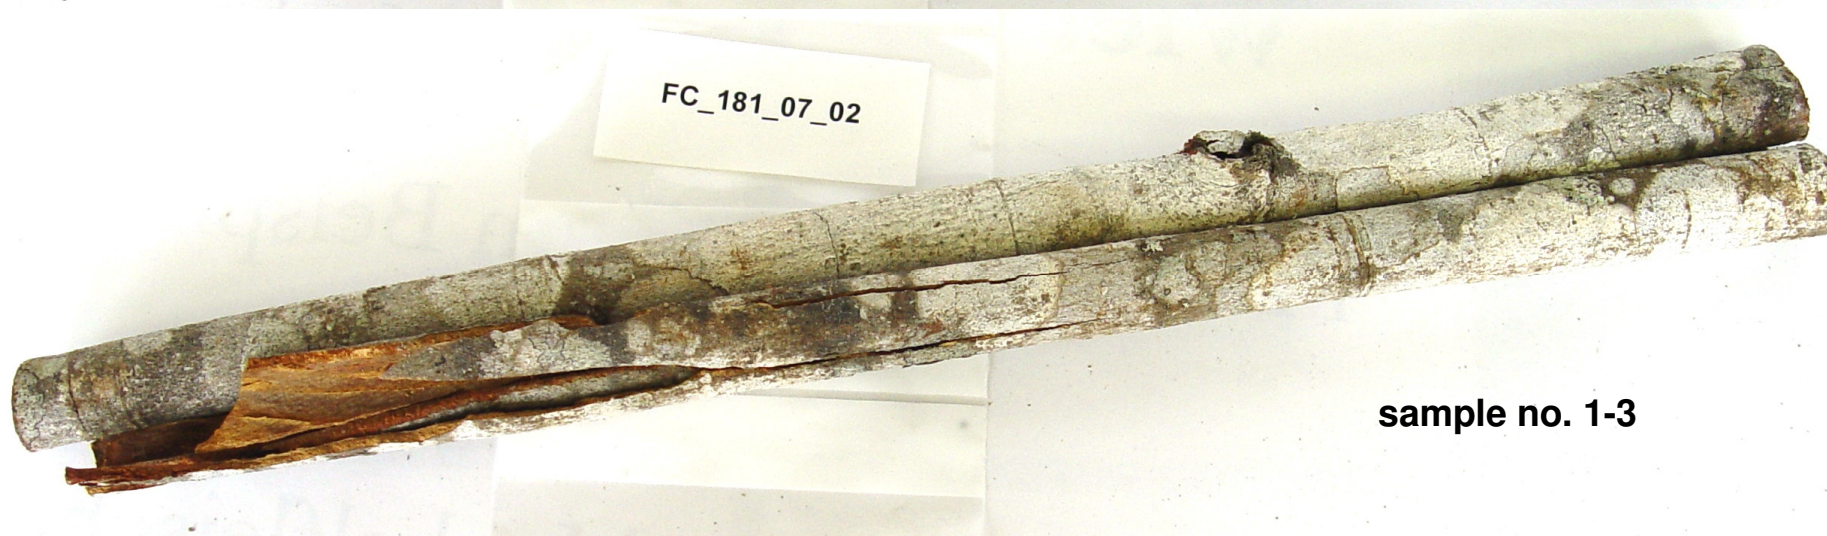

sample no. 1-3



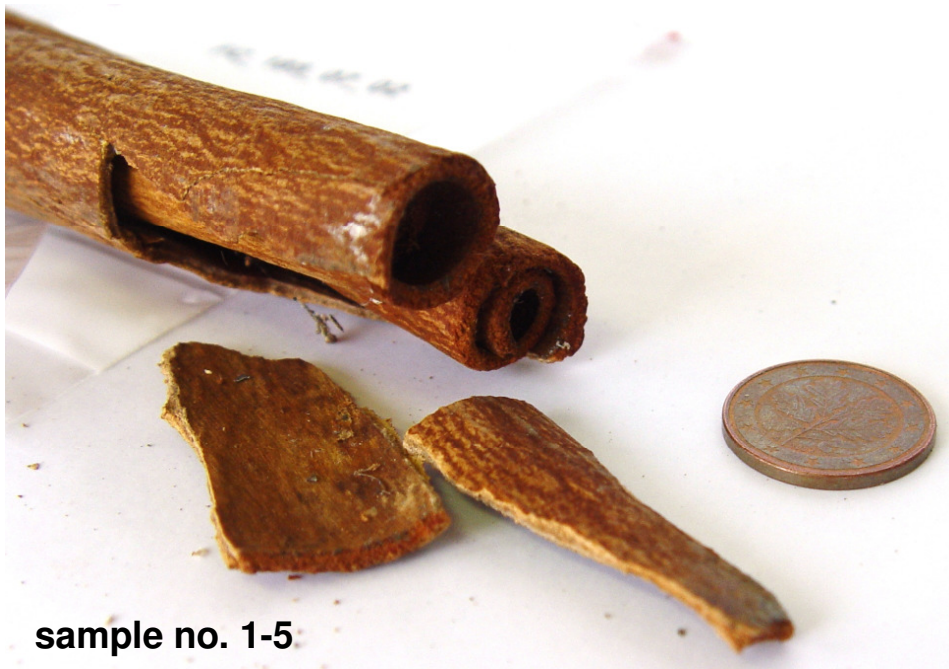

**sample no. 1-5**

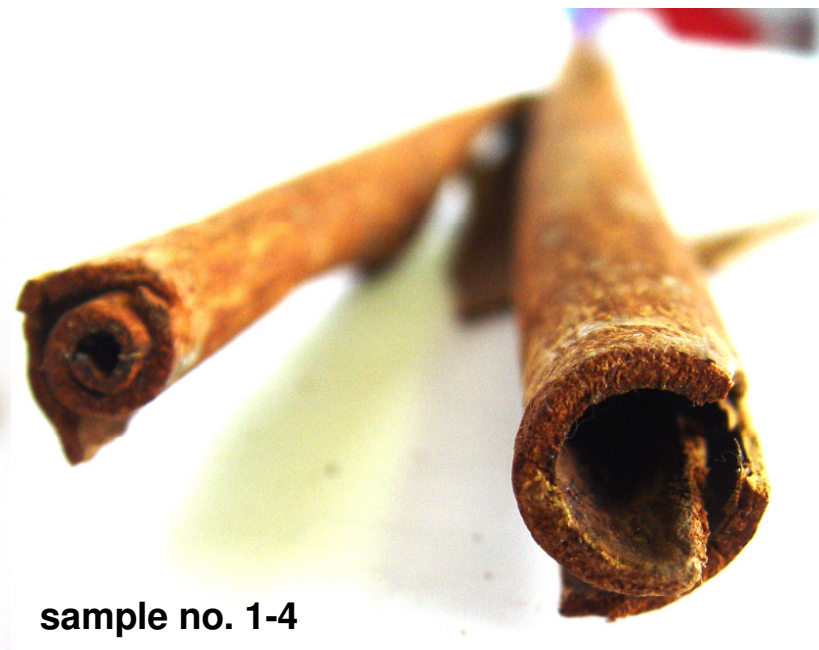

**sample no. 1-4**

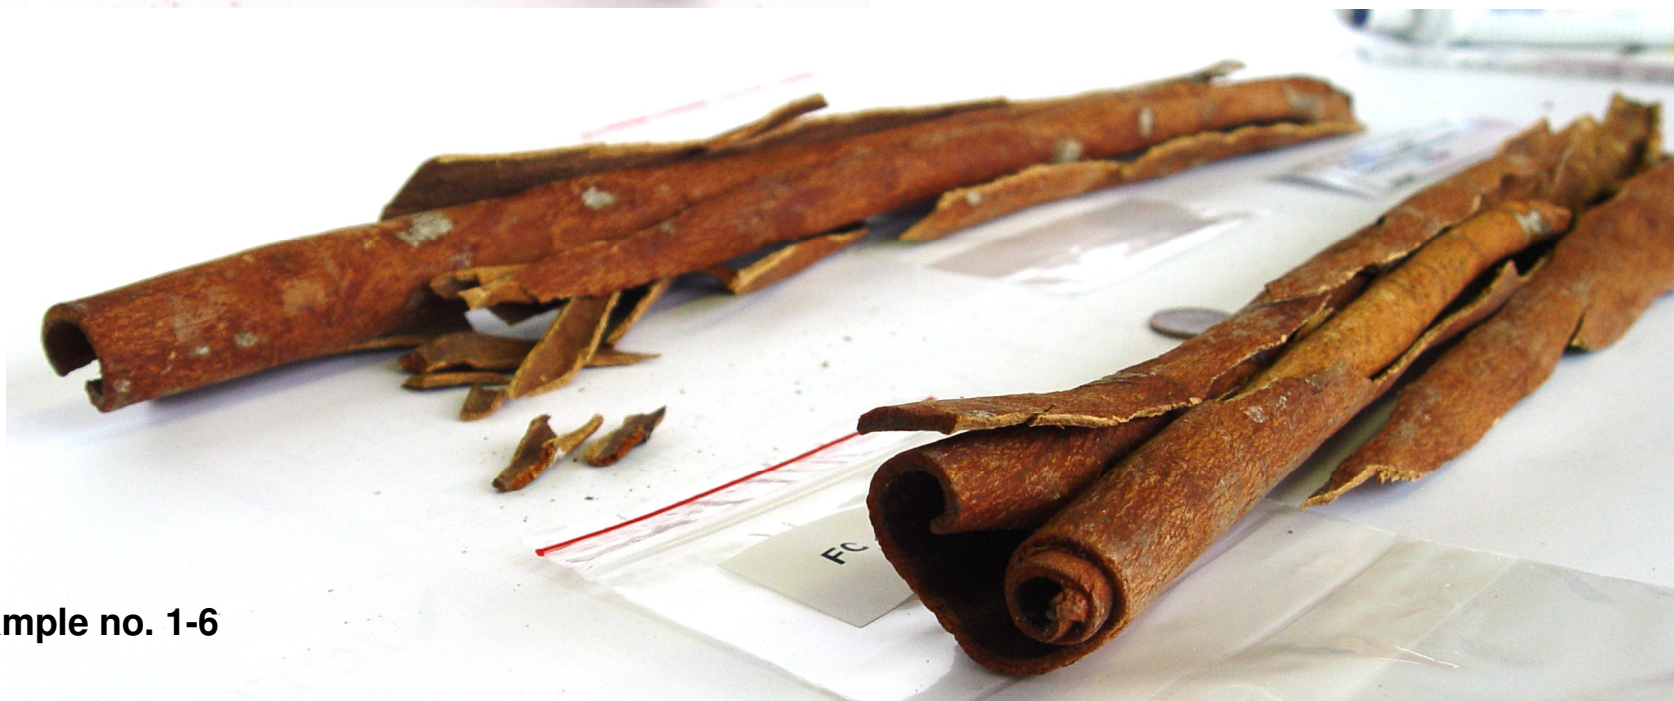

**sample no. 1-6**



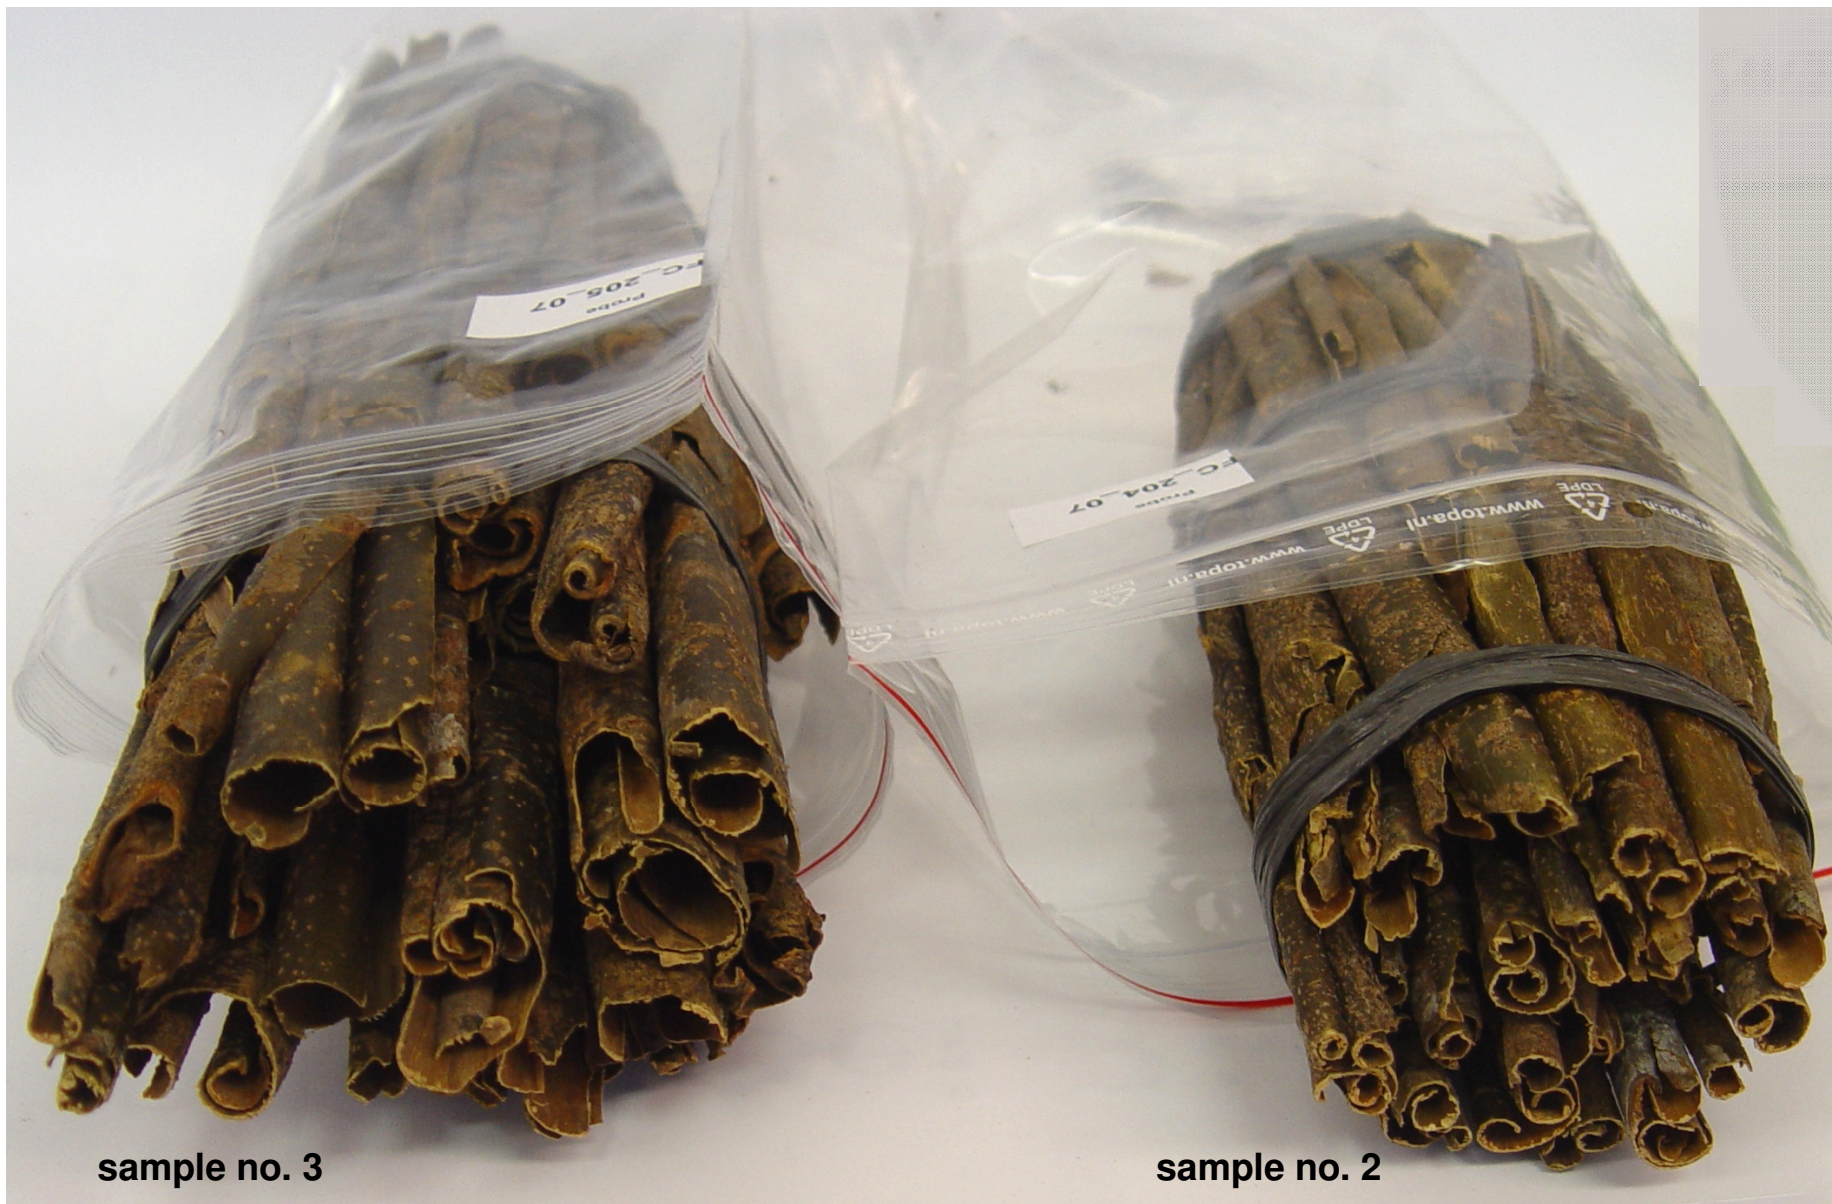

sample no. 3

sample no. 2



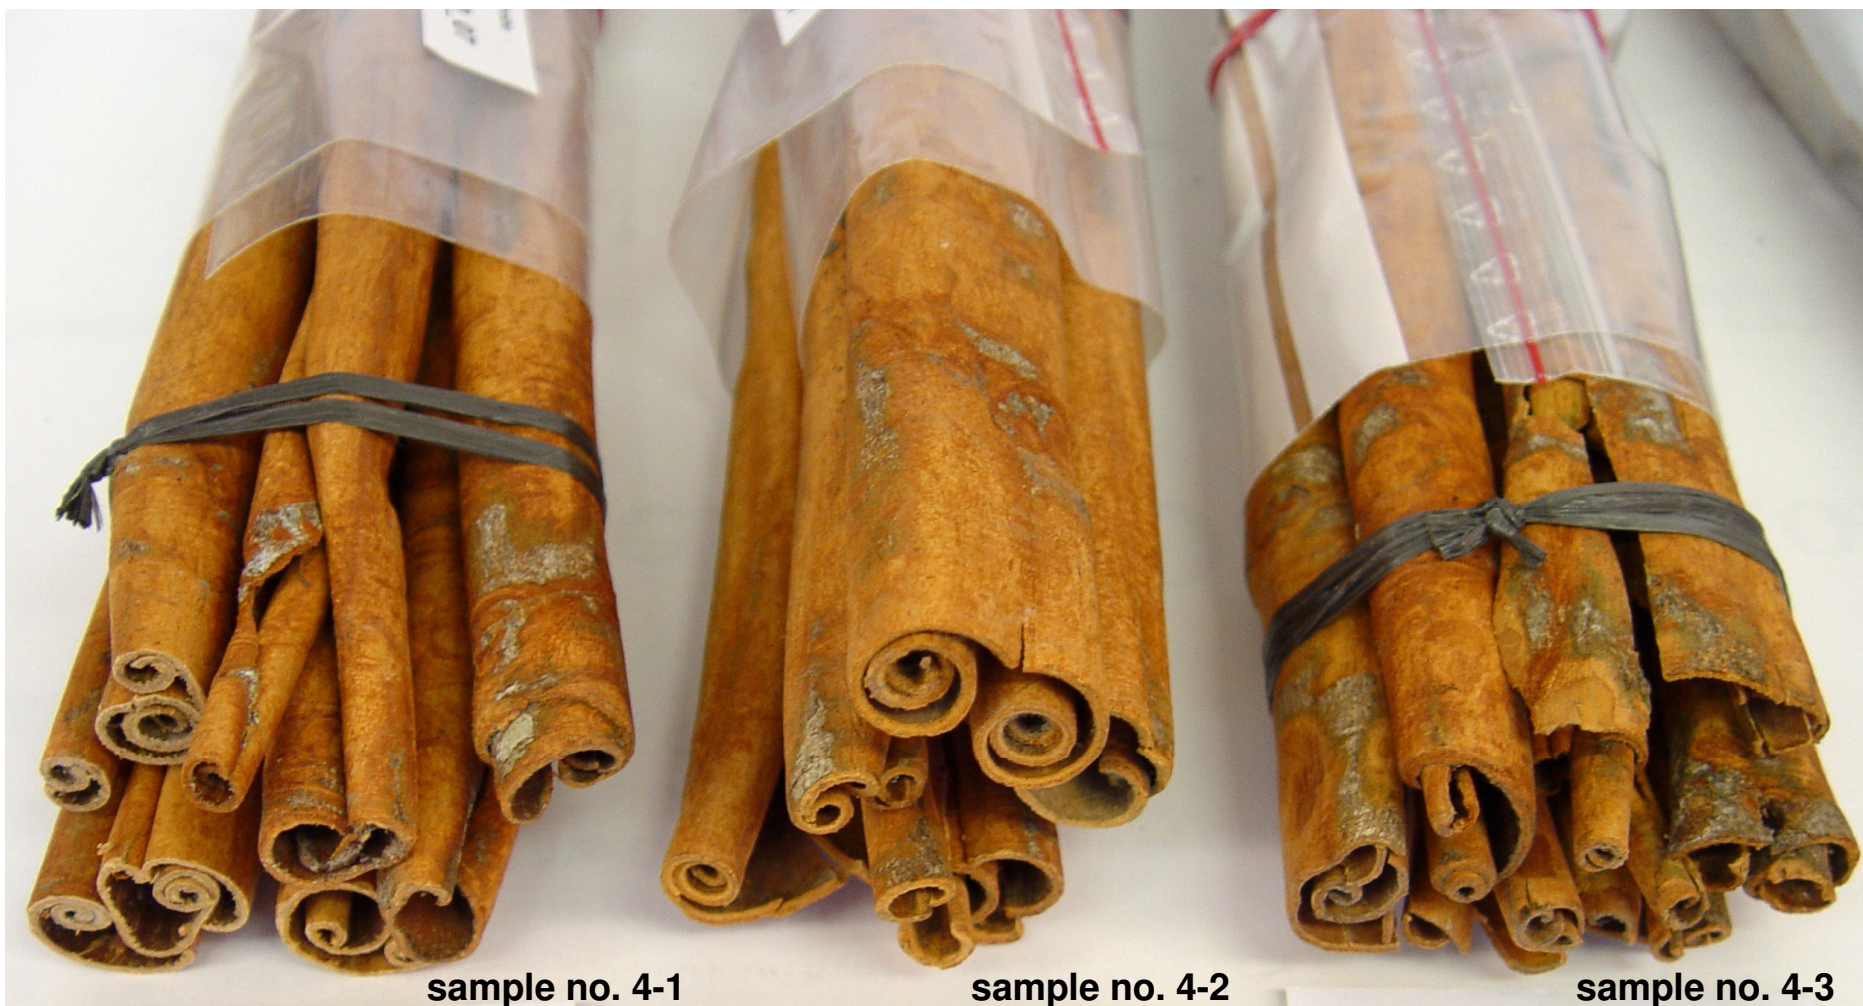

sample no. 4-1

sample no. 4-2

sample no. 4-3



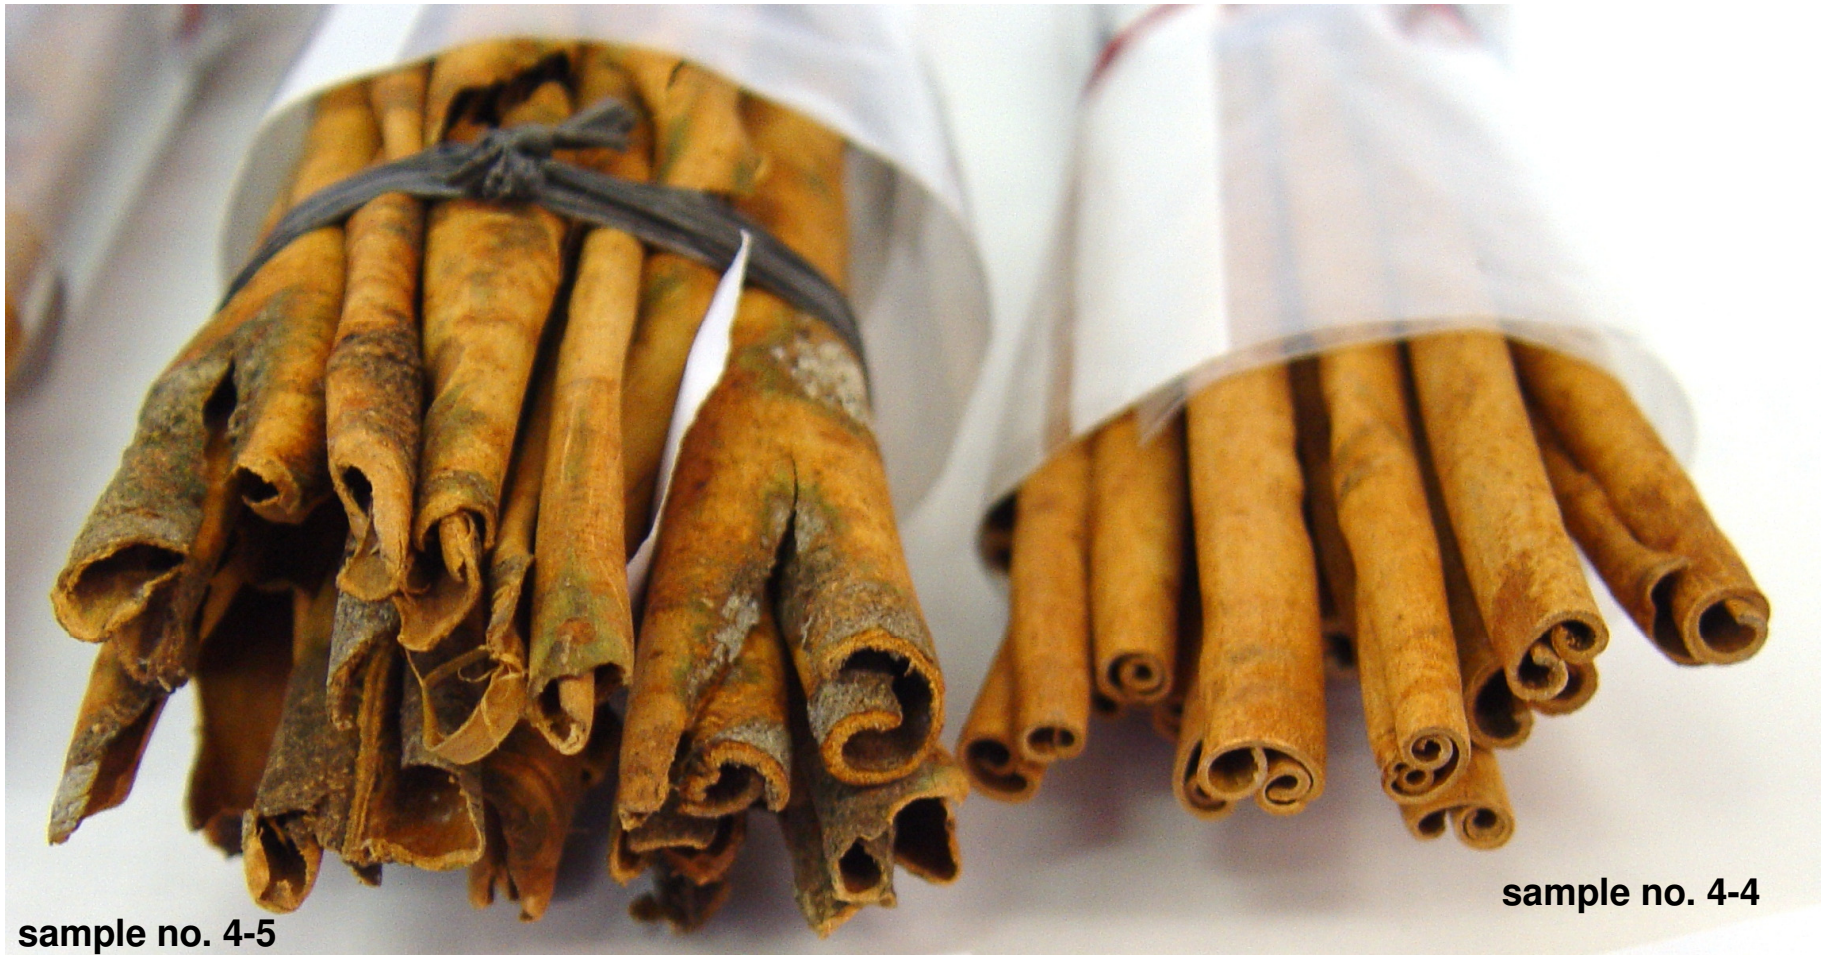

**sample no. 4-5**

**sample no. 4-4**



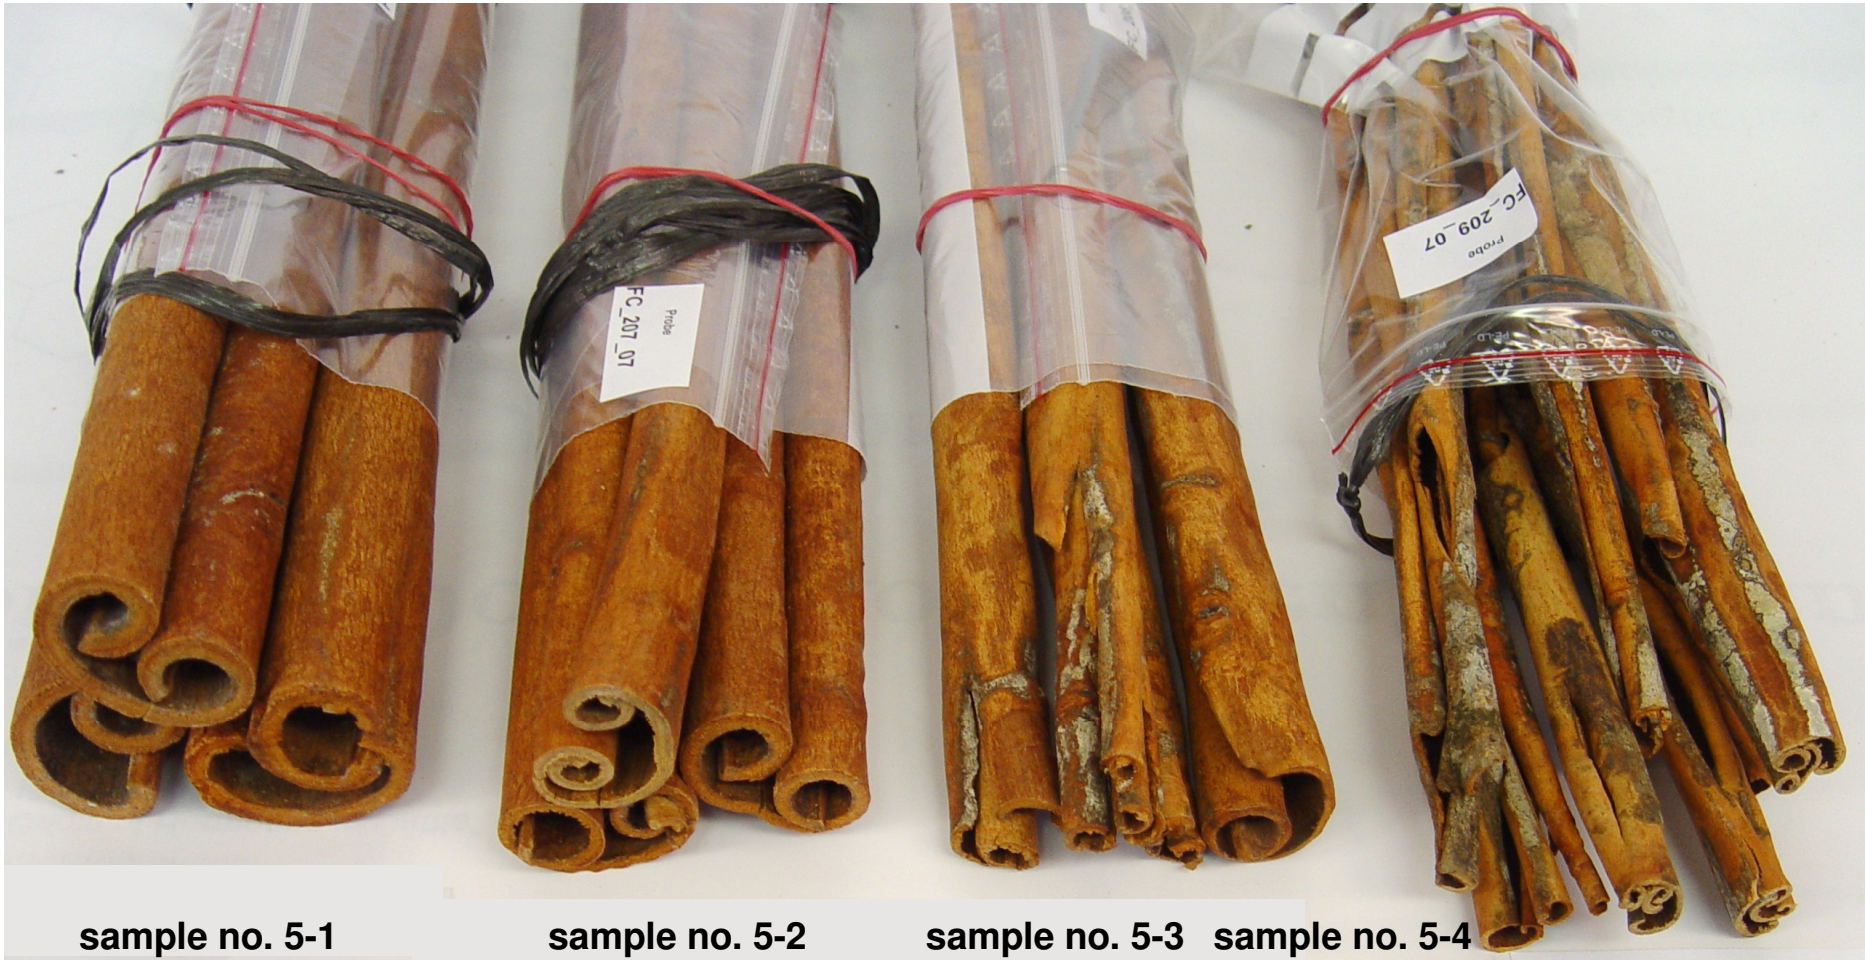

sample no. 5-1

sample no. 5-2

sample no. 5-3

sample no. 5-4
